# Supplementary material for: Cathepsin S provokes interleukin-6 (IL-6) trans-signaling through cleavage of the IL-6 receptor in vitro
Source: PubMed Central journal article supplement (PMC7730449; doi:10.1038/s41598-020-77884-4), 2020-12-10
Supplement: 41598_2020_77884_MOESM1_ESM.pdf [file 41598_2020_77884_MOESM1_ESM.pdf]

# **Cathepsin S provokes interleukin-6 (IL-6) trans-signaling through cleavage of the IL-6 receptor in vitro**

Charlotte M. Flynn<sup>1</sup>, Yvonne Garbers<sup>2</sup>, Stefan Düsterhöft<sup>3</sup>, Rielana Wichert<sup>1</sup>, Juliane Lokau<sup>4</sup>, Christian H.K. Lehmann<sup>5,6</sup>, Diana Dudziak<sup>5,6</sup>, Bernd Schröder<sup>7</sup>, Christoph Becker-Pauly<sup>1</sup>, Stefan Rose-John<sup>1</sup>, Samadhi Aparicio-Siegmund<sup>1</sup>, and Christoph Garbers<sup>4,\*</sup>

<sup>1</sup>Institute of Biochemistry, Kiel University, Kiel, Germany;

<sup>2</sup>Institute of Psychology, Kiel University, Kiel, Germany;

<sup>3</sup>Institute of Molecular Pharmacology, RWTH Aachen University, Aachen, Germany;

<sup>4</sup>Department of Pathology, Otto-von-Guericke-University Magdeburg, Medical Faculty, Magdeburg, Germany;

<sup>5</sup>Laboratory of Dendritic Cell Biology, Department of Dermatology, University Hospital Erlangen, Friedrich-Alexander University of Erlangen-Nürnberg, Erlangen, Germany;

<sup>6</sup>Deutsches Zentrum Immuntherapie (DZI) and Medical Immunology Campus Erlangen, Germany

<sup>7</sup>Institute for Physiological Chemistry, Medizinisch-Theoretisches Zentrum MTZ, Technische Universität Dresden, Fiedlerstraße 42, 01307, Dresden, Germany

\*Correspondence to: Dr. Christoph Garbers ([christoph.garbers@med.ovgu.de](mailto:christoph.garbers@med.ovgu.de), +49 391 67-15488), Department of Pathology, Otto-von-Guericke-University Magdeburg, Medical Faculty, Magdeburg, Germany; Fax: +49 391 67-15818

Figure 5a

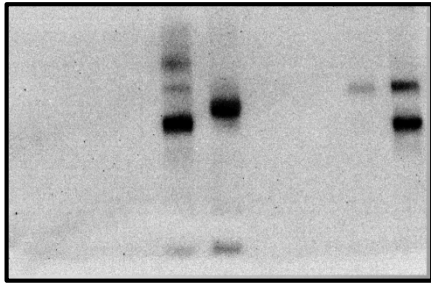

sIL-6R

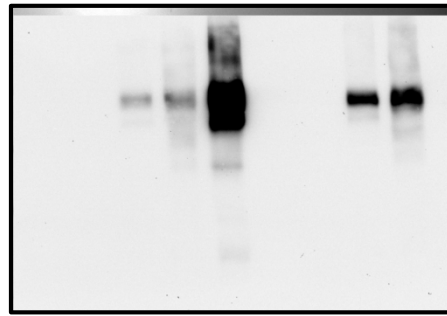

IL-6R

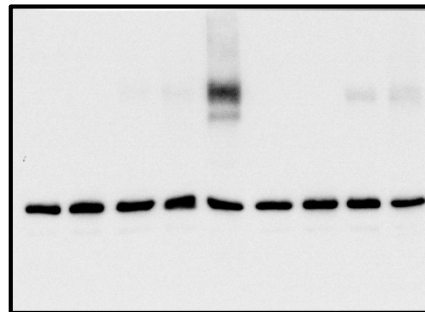

GAPDH

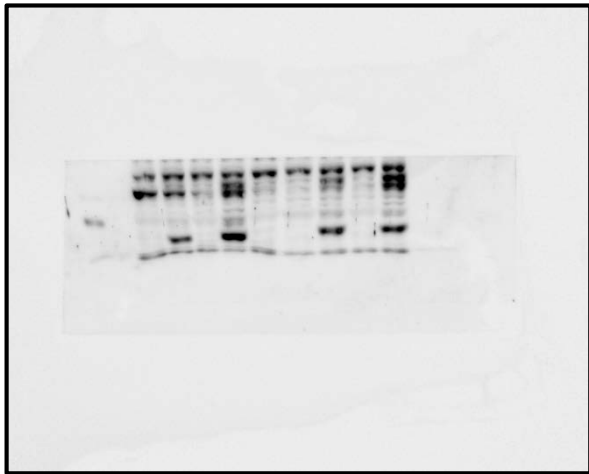

Cathepsin S

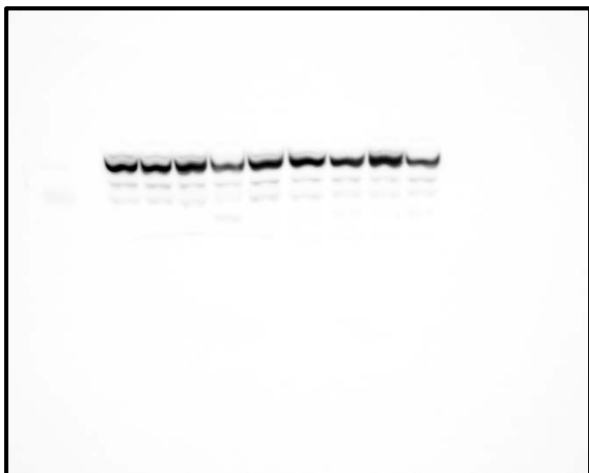

GAPDH

Figure 5c

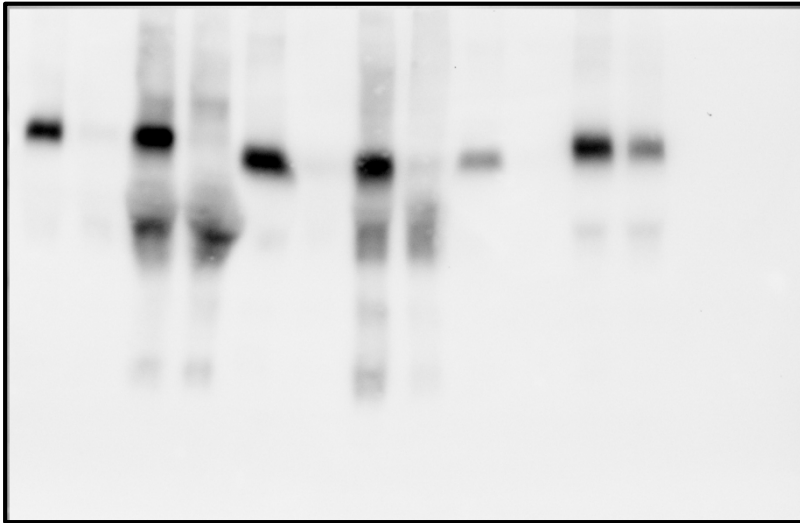

IL-6R

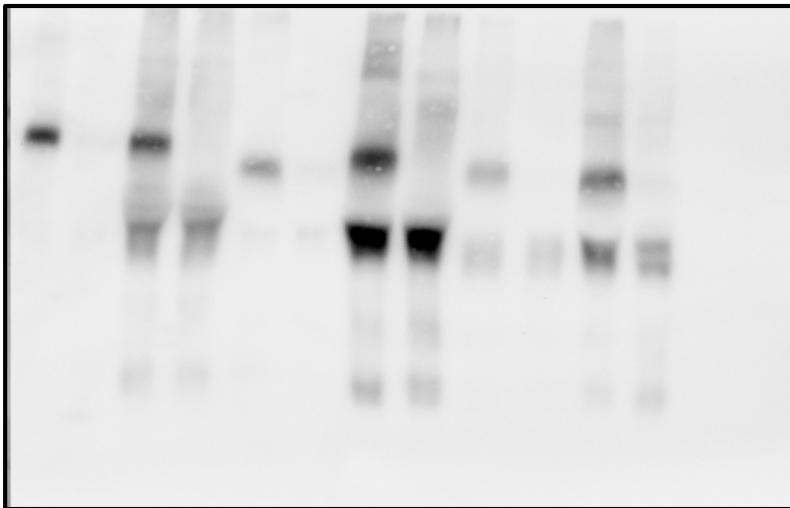

IL-6R

Figure 5d

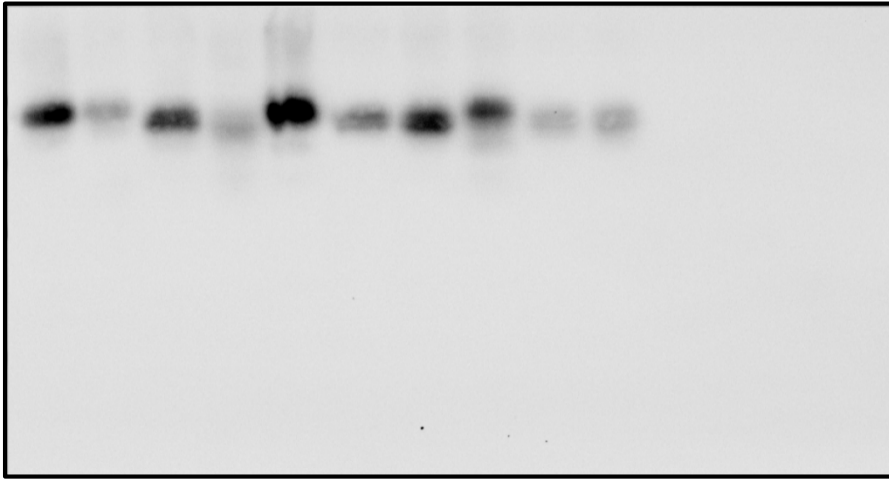

IL-6R

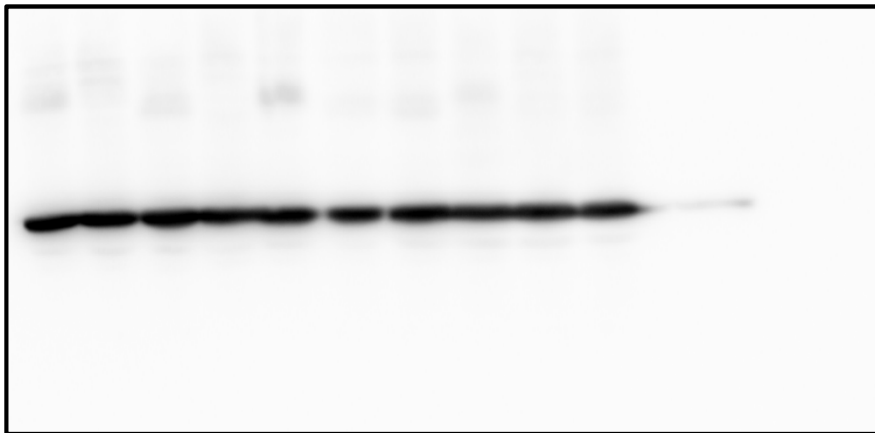

GAPDH
